# Supplementary material for: An Evidence-Based Review of Related Metabolites and Metabolic Network Research on Cerebral Ischemia
Source: PubMed Central journal article supplement (PMC4871976; doi:10.1155/2016/9162074), 2016-05-05
Supplement: 9162074.f1.pdf [file 9162074.f1.pdf]

| No. | Metabolites                            | KEGG ID             | Plasma | Serum | CSF | Cortex | Hippocampus | Striatum | Thalamus +<br>Midbrain | White<br>matter | Whole Brain<br>tissue | Pineal<br>body ,Olfactory bulb | Reference              |
|-----|----------------------------------------|---------------------|--------|-------|-----|--------|-------------|----------|------------------------|-----------------|-----------------------|--------------------------------|------------------------|
| 1   | 2-Hydroxybutyric acid                  | C05984              |        |       | √   |        |             |          |                        |                 |                       |                                | [45, 65]               |
| 2   | 3,4-dihydroxyphenylacetic acid (DOPAC) | C01161              |        |       |     | √      | √           | √        | √                      |                 |                       |                                | [48]                   |
| 3   | 3-Hydroxybutanoic acid                 | C01089              |        |       | √   |        |             |          |                        |                 |                       |                                | [45]                   |
| 4   | 3-Hydroxyisovalerate                   | C20827              |        |       | √   |        |             |          |                        |                 |                       |                                | [45]                   |
| 5   | 3-hydroxypropyl mercapturic acid       | No KEGG<br>ID       |        |       |     | √      | √           | √        |                        | √               |                       |                                | [46, 83]               |
| 6   | 3-methoxy-4-hydroxyphenylglycol(HMPG)  | C05583              |        |       |     | √      | √           | √        |                        | √               |                       |                                | [48]                   |
| 7   | 5-hydroxyindoleacetic acid (5-HIAA)    | C05635              |        |       |     | √      | √           | √        | √                      |                 |                       |                                | [48]                   |
| 8   | 6-Deoxy-6-[18F]Fluoro-L-Ascorbic Acid  | No KEGG<br>ID       |        |       |     |        |             |          |                        |                 |                       | √                              | [82]                   |
| 9   | Acetate                                | C00033              |        |       | √   |        |             |          |                        |                 | √                     |                                | [45, 47, 50]           |
| 10  | Acetone                                | C00207              |        |       | √   |        |             |          |                        |                 |                       |                                | [45]                   |
| 11  | ADP                                    | C00008              |        |       |     | √      |             | √        |                        |                 |                       |                                | [46]                   |
| 12  | Alanine                                | C01401              | √      | √     | √   | √      | √           |          |                        |                 |                       |                                | [43, 45, 46, 50]       |
| 13  | Alpha-2-Ketoisovaleric acid            | C00141              |        |       | √   |        |             |          |                        |                 |                       |                                | [45]                   |
| 14  | alpha-D-Glucose                        | C00267              |        |       |     |        |             |          |                        |                 | √                     |                                | [45, 50]               |
| 15  | Aminoguanidine                         | No KEGG<br>ID       |        |       |     |        |             |          |                        |                 | √                     |                                | [85]                   |
| 16  | AMP                                    | C00020              |        |       |     | √      |             | √        |                        |                 |                       |                                | [46]                   |
| 17  | Arginine                               | C02385              |        |       |     | √      |             | √        |                        |                 |                       |                                | [47]                   |
| 18  | Ascorbate                              | C00072              |        |       |     | √      |             | √        |                        |                 | √                     |                                | [46]                   |
| 19  | Aspartate                              | C16433 <sup>#</sup> |        | √     |     | √      |             | √        |                        |                 | √                     |                                | [43, 46, 50,<br>51,52] |
| 20  | ATP                                    | C00002              |        |       |     | √      |             | √        |                        |                 | √                     |                                | [46]                   |



|    |                                   |                     |   |   |   |   |   |   |   |   |                      |
|----|-----------------------------------|---------------------|---|---|---|---|---|---|---|---|----------------------|
| 45 | Glycerol                          | C00116              |   | √ |   |   |   |   |   |   | [45]                 |
| 46 | Glycerophosphoricacid             | C00093              |   |   | √ |   | √ |   |   |   | [46]                 |
| 47 | Glycine                           | C00037              | √ | √ |   |   |   |   |   | √ | [45, 47, 51]         |
| 48 | GMP                               | C00144              |   |   | √ |   | √ |   |   |   | [46]                 |
| 49 | Guanosine                         | C00387              |   |   | √ |   | √ |   |   |   | [46]                 |
| 50 | Histidine                         | C00768 <sup>#</sup> |   |   | √ |   | √ |   |   | √ | [46]                 |
| 51 | Homocysteine                      | C05330 <sup>#</sup> | √ |   |   |   |   |   |   |   | [43]                 |
| 52 | Homovanillicacid (HVA)            | C05582              |   |   | √ | √ | √ | √ |   |   | [48]                 |
| 53 | Isoleucine                        | C16434 <sup>#</sup> | √ |   | √ |   |   |   |   | √ | [44]                 |
| 54 | Lactate                           | C01432 <sup>#</sup> |   | √ | √ | √ | √ | √ |   | √ | [47, 49, 52, 62, 63] |
| 55 | Leucine                           | C16439 <sup>#</sup> | √ |   | √ |   |   |   |   |   | [44]                 |
| 56 | leukotriene C4                    | C02166              |   |   |   |   |   |   |   | √ | [84]                 |
| 57 | Lysine                            | C16440 <sup>#</sup> |   |   | √ |   |   |   |   |   | [44]                 |
| 58 | L-Malate                          | C00149              |   |   | √ |   | √ |   |   | √ | [46, 50]             |
| 59 | Malonate                          | C00383              | √ |   |   |   |   |   |   |   | [47]                 |
| 60 | L-Methionine                      | C00073              | √ |   |   |   |   |   |   |   | [43]                 |
| 61 | Myo-Inositol                      | C00137              |   | √ | √ | √ | √ |   |   |   | [49, 50, 62]         |
| 62 | N-acetylaspartate (NAA)           | C01042              | √ |   | √ | √ | √ | √ | √ | √ | [46, 49, 52, 62-64]  |
| 63 | N-Acetylaspartylglutamate (NAAG)  | No KEGG ID          |   |   | √ |   | √ |   |   | √ | [46, 81]             |
| 64 | NAD+                              | C00003              |   |   | √ |   | √ |   |   |   | [46]                 |
| 65 | neu5Ac                            | C00270              |   |   | √ |   | √ |   |   |   | [46]                 |
| 66 | NG-nitro-L-arginine methyl nester | No KEGG ID          |   |   |   |   | √ |   |   |   | [80]                 |

|    |                     |                     |   |   |   |   |   |   |   |                  |
|----|---------------------|---------------------|---|---|---|---|---|---|---|------------------|
| 67 | Nicotinuric acid    | C05380              |   |   | √ |   | √ |   |   | [50]             |
| 68 | Norepinephrine (NE) | C00547              |   |   | √ | √ | √ | √ |   | [48]             |
| 69 | Ornithine           | C01602 <sup>#</sup> | √ |   |   |   |   |   |   | [47]             |
| 70 | Oxaloacetate        | C00036              |   | √ |   |   |   |   |   | [45]             |
| 71 | PE                  | No KEGG<br>ID       |   |   | √ |   | √ |   |   | [46]             |
| 72 | PEP                 | C00074              |   |   | √ |   | √ |   |   | [46]             |
| 73 | Phenylalanine       | C02057 <sup>#</sup> | √ |   | √ |   | √ |   |   | [44, 46]         |
| 74 | polyamines          | No KEGG<br>ID       |   |   | √ | √ |   |   | √ | [86]             |
| 75 | prostaglandin E2    | C00584              |   |   |   |   |   |   | √ | [84]             |
| 76 | pseudouridine       | C02067              |   |   | √ |   | √ |   |   | [46]             |
| 77 | putrescine          | C00134              |   |   | √ | √ |   |   | √ | [66, 87]         |
| 78 | Pyruvate            | C00022              | √ | √ |   |   |   |   |   | [45, 47]         |
| 79 | Ribose 5-phosphate  | C00117              |   |   | √ |   | √ |   |   | [46]             |
| 80 | L-Serine            | C00065              | √ | √ |   |   |   |   |   | [45, 47]         |
| 81 | Serotonin(5-HT)     | C00780              |   |   | √ | √ | √ | √ |   | [48, 59, 60]     |
| 82 | spermidine          | C00315              |   |   | √ | √ |   |   | √ | [66, 88]         |
| 83 | spermine            | C00750              |   |   | √ | √ |   |   | √ | [66, 88]         |
| 84 | Succinate           | C00042              | √ |   |   |   |   |   | √ | [50]             |
| 85 | Taurine             | C00245              |   |   | √ |   | √ |   | √ | [46, 50, 51, 57] |
| 86 | L-Threonine         | C00188              | √ |   |   |   |   |   |   | [47]             |
| 87 | D-Threonine         | C00820              | √ |   |   |   |   |   |   | [47]             |
| 88 | L-Tryptophan        | C00078              | √ |   | √ | √ |   |   |   | [43, 46]         |
| 89 | Tryptophan          | C00806 <sup>#</sup> | √ |   | √ | √ |   |   |   | [43, 46]         |
| 90 | L-Tyrosine          | C00082              | √ |   | √ |   | √ |   |   | [43, 45, 46]     |

|     |                          |                     |   |   |   |   |              |
|-----|--------------------------|---------------------|---|---|---|---|--------------|
| 91  | D-Tyrosine               | C06420 <sup>#</sup> | √ | √ | √ |   | [43, 45, 46] |
| 92  | UDP                      | C00015              |   | √ | √ | √ | [46, 50]     |
| 93  | UDP-glucose              | C00029              |   | √ | √ |   | [46]         |
| 94  | UMP                      | C00105              |   | √ | √ |   | [46]         |
| 95  | Uracil                   | C00106              |   | √ | √ | √ | [46, 50]     |
| 96  | Uridine                  | C00299              |   | √ | √ |   | [46]         |
| 97  | UTP                      | C00075              |   |   |   | √ | [50]         |
| 98  | Valine                   | C16436 <sup>#</sup> | √ | √ | √ |   | [44, 47]     |
| 99  | Xanthine                 | C00385              |   | √ | √ | √ | [46, 50]     |
| 100 | γ-Hydroxybutyrate        | C00989              |   |   | √ |   | [65]         |
| 101 | sulfatide (d18:1-C24h:0) | No KEGG<br>ID       |   |   |   | √ | [66]         |
| 102 | PC 32:0                  | No KEGG<br>ID       |   | √ | √ | √ | [67]         |
| 103 | PC 34:1                  | No KEGG<br>ID       |   | √ | √ | √ | [67]         |
| 104 | PC 36:4                  | No KEGG<br>ID       |   | √ | √ | √ | [67]         |
| 105 | SM 18:0                  | No KEGG<br>ID       |   | √ | √ | √ | [67]         |
| 106 | LPC 16:0                 | No KEGG<br>ID       |   | √ | √ | √ | [67]         |
| 107 | LPC 18:1                 | No KEGG<br>ID       |   | √ | √ | √ | [67]         |
| 108 | LPC 18:0                 | No KEGG<br>ID       |   | √ | √ | √ | [67]         |

|     |                   |               |   |   |   |      |
|-----|-------------------|---------------|---|---|---|------|
| 109 | PC 34:0           | No KEGG<br>ID | √ | √ | √ | [67] |
| 110 | PC 36:1           | No KEGG<br>ID | √ | √ | √ | [67] |
| 111 | PC 40:6           | No KEGG<br>ID | √ | √ | √ | [67] |
| 112 | Ceramide 18:0-H2O | No KEGG<br>ID | √ | √ | √ | [67] |
| 113 | PC 16:0/16:0      | No KEGG<br>ID | √ | √ | √ | [67] |
| 114 | PC 16:0/18:1      | No KEGG<br>ID | √ | √ | √ | [67] |
| 115 | PC 16:0/18:0      | No KEGG<br>ID | √ | √ | √ | [67] |
| 116 | PC 16:0/20:4      | No KEGG<br>ID | √ | √ | √ | [67] |
| 117 | PC 18:0/18:1      | No KEGG<br>ID | √ | √ | √ | [67] |
| 118 | PC 16:0/22:6      | No KEGG<br>ID | √ | √ | √ | [67] |
| 119 | PC 18:0/20:4      | No KEGG<br>ID | √ | √ | √ | [67] |
| 120 | PC 18:0/22:6      | No KEGG<br>ID | √ | √ | √ | [67] |

**C00000<sup>#</sup>, lacked pathway annotation in KEGG**
